# Supplementary material for: Risk factors for stillbirth in Freetown, Sierra Leone – The StillFree study
Source: Research Square preprint supplement (doi:10.21203/rs.3.rs-7889661/v1), 2025-11-11
Supplement: Supplementary file 1 [file 34bbe3eb731d325a624801f3.docx]

| **Table 1** |  |  |
| --- | --- | --- |
| **Baseline characteristics of the StillFree study participants in Freetown, Sierra Leone (n = 404).** | | |
| **Values are presented as mean ± standard deviation or number with percentage.** | | |
|  |  |  |
| **Variable** | **Value** | **%** |
|  |  |  |
| ***Demographic and socio-economic variables*** |  |  |
| Age, years | 25.7 ± 5.7 |  |
| Educational status |  |  |
| No education or primary | 207 | 51,2 |
| Secondary education or higher | 197 | 48,8 |
| Marital status |  |  |
| Married | 313 | 77,5 |
| Single | 91 | 22,5 |
| Employment status |  |  |
| Employed | 239 | 59,2 |
| Student | 50 | 12,4 |
| Unemployed | 117 | 29,0 |
| Alcohol use | 3 | 0,7 |
| Smoke | 2 | 0,5 |
| Admission status |  |  |
| Referred from other facility | 185 | 45,8 |
| Non referred | 219 | 54,2 |
| ***Medical conditions*** |  |  |
| Chronic hypertension | 5 | 1,2 |
| Diabetes | 2 | 0,5 |
| Gastric ulcer | 10 | 2,5 |
| Sickle cell disease | 6 | 1,5 |
| HIV infection | 7 | 1,7 |
| ***Obstetric variables*** |  |  |
| Parity |  |  |
| Nulliparity | 152 | 37,6 |
| Pluriparity (1 or more) | 248 | 61,4 |
| Previous cesarean section (1 or more) | 46 | 11,4 |
| History of abortion (1 or more) | 31 | 7,7 |
| Hystory of stillbirth (1 or more) | 25 | 6,2 |
| Antenatal clinic visits, n. | 4.2 ± 1.8 |  |
| Fetal malpresentation (non cephalic) | 45 | 11,1 |
| Labor onset | 0 | 0,0 |
| Spontaneous | 315 | 78,0 |
| Induced | 21 | 5,2 |
| No labor | 68 | 16,8 |
| Mode of delivery |  |  |
| Spontaneous vaginal delivery | 248 | 61,4 |
| Vacuum assisted delivery | 4 | 1,0 |
| Cesarean section | 152 | 37,6 |
| Gestational age at birth, weeks | 36.2 ± 3.1 |  |
| Birth weight, kilograms | 3.0 ± 0.9 |  |
| Meconium-stained liquor | 201 | 49,8 |
| Oxytocin augmentation | 23 | 5,7 |
| Partograph correctly filled | 223 | 55,2 |
| Regular monitoring of maternal vital signs | 344 | 85,1 |
| Cardiotocographic monitoring | 66 | 16,3 |
| ***Pregnancy complications*** |  |  |
| Hypertensive disorders of pregnancy | 39 | 9,7 |
| Gestational diabetes | 2 | 0,5 |
| Anemia | 6 | 1,5 |
| Abruptio placenta | 42 | 10,4 |
| Placenta previa | 7 | 1,7 |
| Malaria infection | 13 | 3,2 |
| Prolonged/obstructed labour | 45 | 11,1 |
| ***Maternal outcomes*** |  |  |
| Hemotransfusion for hemorrhage | 75 | 18,6 |
| Admission to High-Dependency Unit | 15 | 3,7 |
| Maternal death | 4 | 1,0 |

| **Table 2** |  |  |  |
| --- | --- | --- | --- |
| **The association between antepartum factors and stillbirth among women with stillbirth versus those with live births in Freetown, Sierra Leone (n = 203 vs 201).** | | | |
| **Abbreviations: aOR = adjusted odds ratio; CI = confidence interval.** | | |  |
|  |  |  |  |
| **Variable** | **aOR** | **CI 95%** | ***P* value** |
|  |  |  |  |
| Maternal age >=35 years | 1,071 | 1.025-1.119 | **0,002** |
| Nulliparity | 1.001 | 0.127-4.822 | 0,974 |
| Previous cesarean section (1 or more) | 1.538 | 0.239-1.212 | 0,135 |
| Smoking habit | 0.998 | 0.049-6.864 | 0,98 |
| Alcohol consumption | 6.841 | 0.422-16.168 | 0,99 |
| Chronic medical condition* | 1.246 | 0.373-1.938 | 0,7 |
| Referred cases | 4,397 | 2.643-7.313 | **<0.001** |
| Antenatal care visits (n.<4) | 1,883 | 1.445-1.976 | **0,015** |
| Previous stillbirth | 2,501 | 0.935-6.693 | 0,068 |
| Fetal malpresentation | 3.602 | 0.824-7.784 | 0,245 |
| Prematurity (<37 weeks) | 1.800 | 1.734-1.871 | **<0.001** |
| Low birth weight (<2,500 grams) | 1.211 | 0.845-1.760 | 0,093 |
| Malaria infection in pregnancy | 10.385 | 1.279-84.299 | **0,028** |
| Hypertensive disorders of pregnancy | 1.769 | 0.733-2.320 | 0,862 |
| Abruptio placenta | 15.491 | 3.469-69.184 | **<0.001** |
| Prolonged/obstructed labor | 1.749 | 0.867-3.825 | 0,133 |
|  |  |  |  |
| * Chronic medical condition included: hypertension, diabetes, sickle-cell disease, HIV infection, gastric ulcer. | | | |
|  |  |  |  |

| **Table 3** |  |  |  |
| --- | --- | --- | --- |
| **Factors associated with stillbirth in women with live fetus at admission versus women with live births in Freetown, Sierra Leone (n = 48 vs 201).** | | | |
| **Abbreviations: aOR = adjusted odds ratio; CI = confidence interval.** | | |  |
|  |  |  |  |
| **Variable** | **aOR** | **CI 95%** | ***P* value** |
|  |  |  |  |
| Maternal age >=35 years | 1.050 | 0.976-1.130 | 0,193 |
| Nulliparity | 1.314 | 0.429-4.028 | 0,633 |
| Previous cesarean section (1 or more) | 0.307 | 0.062-1.512 | 0,147 |
| Smoking habit | 1.998 | 0.049-5.864 | 0,98 |
| Alcohol consumption | 1.841 | 0.422-3.168 | 0,99 |
| Chronic medical condition* | 1.575 | 0.244-10.161 | 0,633 |
| Referred cases | 3.083 | 1.313-7.240 | **0,01** |
| Antenatal care visits (n.<4) | 1.062 | 0.985-1.145 | 0,119 |
| Previous stillbirth | 3.020 | 0.728-12.528 | 0,128 |
| Fetal malpresentation | 3.602 | 0.824-7.784 | 0,245 |
| Prematurity (<37 weeks) | 1.242 | 0.906-1.783 | 0,908 |
| Low birth weight (<2,500 grams) | 1.434 | 1.223-1.448 | **0,015** |
| Pregnancy complication** | 1.952 | 0.603-6.318 | 0,264 |
| Prolonged/obstructed labor | 2.357 | 0.667-8.337 | 0,153 |
| Operative delivery*** | 1.363 | 0.411-4.525 | 0,613 |
| Meconium-stained liquor | 10.071 | 3.008-33.721 | **<0.001** |
| Delivery during day duty | 0.985 | 0.919-1.015 | 0,657 |
| Oxytocin augmentation | 31.721 | 2.145-49.018 | **0,012** |
| Partograph correctly filled | 0.114 | 0.032-0.404 | **<0.001** |
| Monitoring of maternal vital signs | 1.312 | 0.330-5.219 | 0,7 |
| Cardiotocographic monitoring | 4.663 | 0.967-22.501 | 0,055 |
| Low birth weight (<2,500 grams) | 1.434 | 1.223-1.448 | **0,015** |
|  |  |  |  |
| * Chronic medical condition included: hypertension, diabetes, sickle-cell disease, HIV infection, gastric ulcer. | | | |
| ** Including hypertensive disorders, gestational diabetes, abruptio placenta, malaria infection. | | | |
| *** Including vacuum-assisted and cesarean delivery. | |  |  |
|  |  |  |  |
